# Supplementary material for: The Pattern of Progression to First-Line Treatment with Dabrafenib and Trametinib in Patients with Unresectable or Metastatic, BRAF-Mutated, Cutaneous Melanoma: Results of the Observational T-WIN Study
Source: MDPI journal article supplement (doi:10.3390/cancers15071980), 2023-03-26
Supplement: s1 [file s1]

**Table S1 Clinical benefit according to metastatic site at baseline.** Data were reported as median and 95% confidence intervals.

| <b>Cohort A</b> |                         |                   | <b>Cohort B</b> |                    |                  |
|-----------------|-------------------------|-------------------|-----------------|--------------------|------------------|
|                 | <b>OS</b>               | <b>PFS</b>        |                 | <b>OS</b>          | <b>PFS</b>       |
| Liver (n=26)    | 20.6 months<br>(9.9-NE) | 8.9<br>(6.6-12.5) | Liver (n=46)    | 6.8<br>(5.6-8.2)   | 5.7<br>(4.2-6.6) |
| Brain (n=14)    | NE<br>(8.2-NE)          | 12.5<br>(6.6-NE)  | Brain (n=37)    | 8.3<br>(6.6-11.7)  | 6.9<br>(5.2-9.4) |
| Skin (n=16)     | NE                      | NE                | Skin (n=16)     | 10.3<br>(5.7-14.0) | 7.0<br>(4.0-9.9) |

**Table 2S Second-line treatment**

|               | <b>Cohort A<br/>(n=46)</b> | <b>Cohort B<br/>(n=32)</b> |
|---------------|----------------------------|----------------------------|
| Pembrolizumab | 9                          | 5                          |
| Nivolumab     | 19                         | 23                         |
| Ipilimumab    | 1                          | 2                          |
| Encorafenib   | 2                          | 1                          |
| Binimetinib   | 2                          | 1                          |
| Not specified | 13                         | 0                          |
